# Supplementary material for: (Ionic liquid)-derived morphology control of Nb2O5materials and their photocatalytic properties
Source: Royal Society of Chemistry journal article supplement (doi:10.1039/c4ce00987h), 2014-07-31
Supplement: c4ce00987h1.pdf [file c4ce00987h1.pdf]

## Supporting information

### (Ionic liquid)-derived morphology control of Nb<sub>2</sub>O<sub>5</sub> materials and their photocatalytic properties

*Lei Du, Zhouyang Long, Haimeng Wen, Weilin Ge, Yu Zhou\*, Jun Wang\**

State Key Laboratory of Materials-Oriented Chemical Engineering, College of Chemistry and Chemical Engineering, Nanjing Tech University, Nanjing 210009, P. R. China

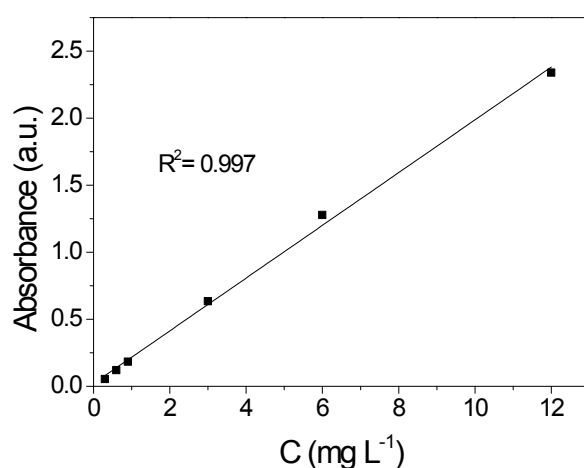

**Figure S1.** The calibration curve of methylene blue concentration. When the concentration of the methylene blue was above 12 mg·L<sup>-1</sup>, it was diluted by adding water to fit the scope of the standard curve.

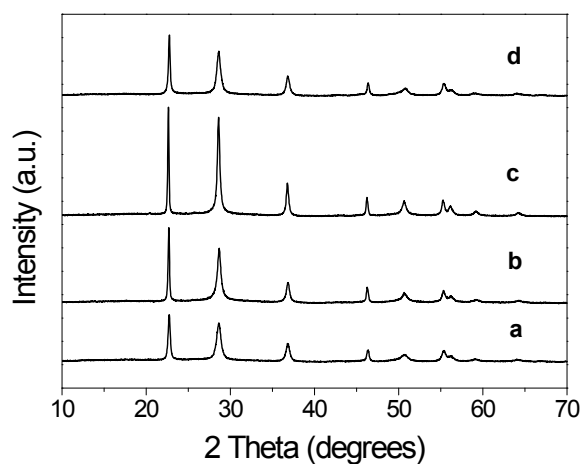

**Figure S2.** XRD patterns of Nb<sub>2</sub>O<sub>5</sub> synthesized with the [Nb]:[[BMIm]Br] ratios of (a) 1:0.1, (b) 1:0.5, (c) 1:1, and (d) 1:3.

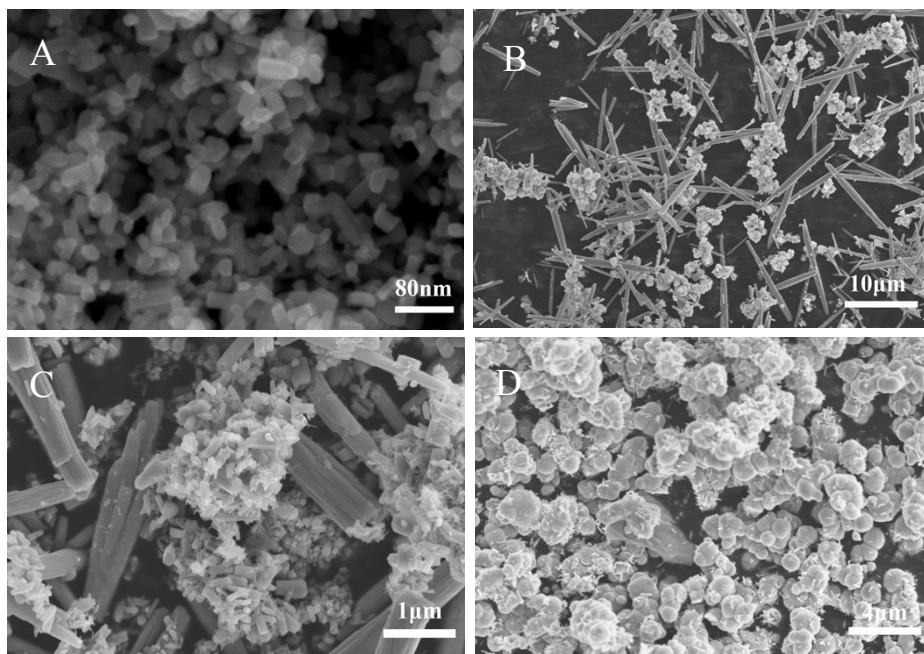

**Figure S3.** SEM images of the samples synthesized with the [Nb]:[[BMIm]Br] ratios of (A) 1:0.1, (B) 1:0.5, (C) 1:1, and (D) 1:3.

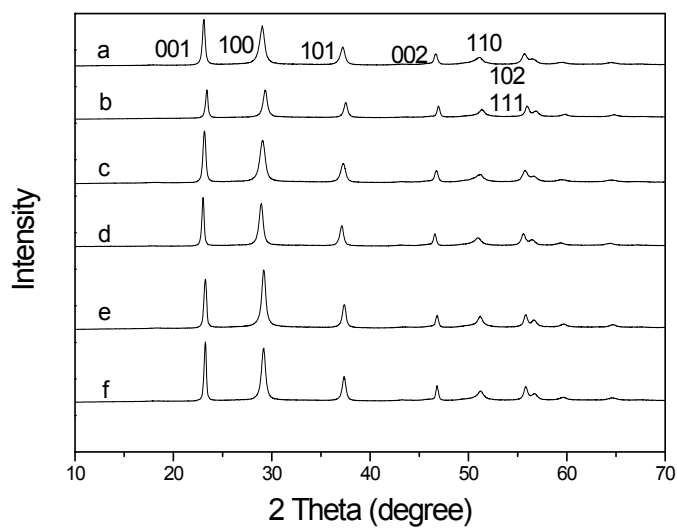

**Figure S4.** XRD patterns of  $\text{Nb}_2\text{O}_5$  synthesized with molar ratio of [Nb]:[[BMIm]Br]=1:1.5 under different hydrothermal time: (a) 0, (b) 1, (c) 3, (d) 6, (e) 12 and (f) 24 h.

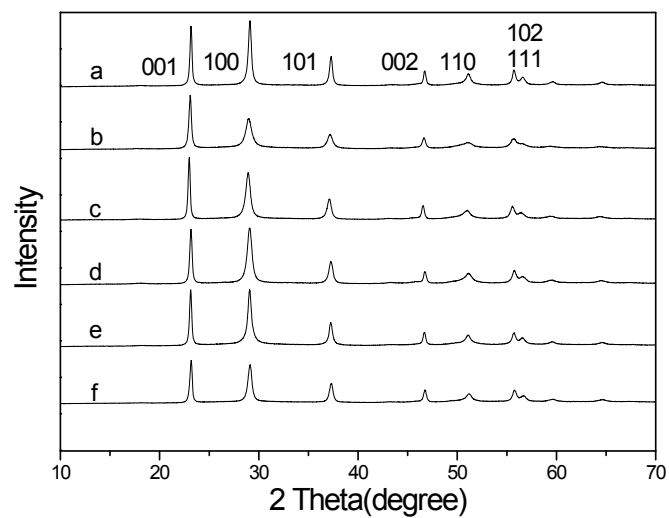

**Figure S5.** XRD patterns of  $\text{Nb}_2\text{O}_5$  synthesized with molar ratio of  $[\text{Nb}]:[[\text{BMIm}]\text{Br}]=1:4$  under different hydrothermal time: (a) 0, (b) 1, (c) 3, (d) 6, (e) 12 and (f) 24 h.

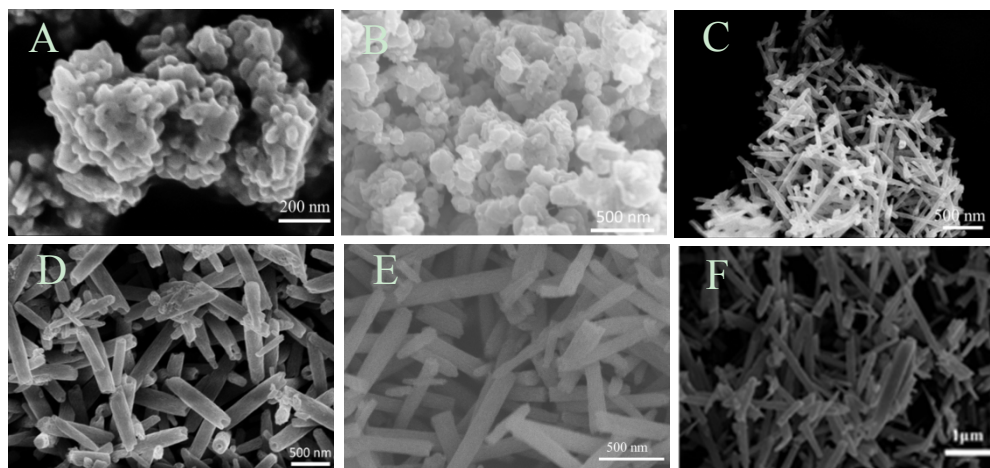

**Figure S6.** SEM images of  $\text{Nb}_2\text{O}_5$  synthesized with molar ratio of  $[\text{Nb}]:[[\text{BMIm}]\text{Br}]=1:1.5$  under different hydrothermal time: (a) 0, (b) 1, (c) 3, (d) 6, (e) 12 and (f) 24 h.

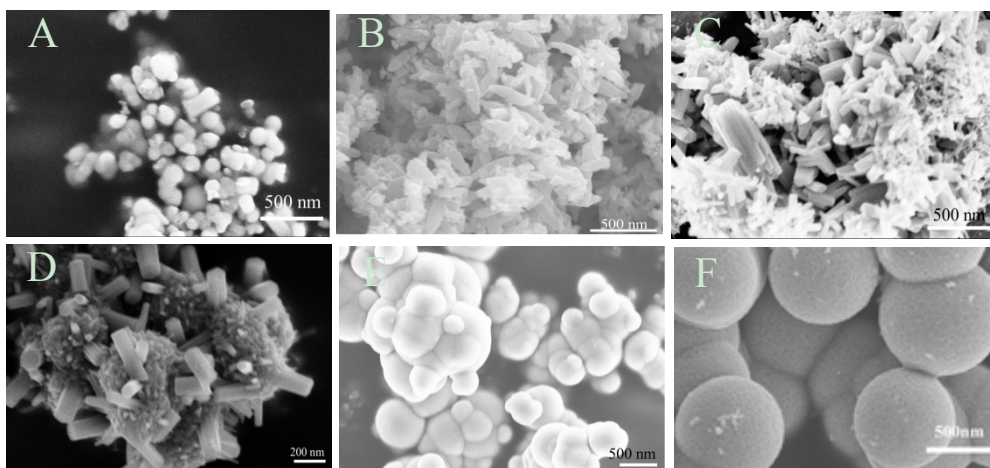

**Figure S7.** SEM images of  $\text{Nb}_2\text{O}_5$  synthesized with molar ratio of  $[\text{Nb}]:[[\text{BMIm}]\text{Br}]=1:4$  under different hydrothermal time: (a) 0, (b) 1, (c) 3, (d) 6, (e) 12 and (f) 24 h.

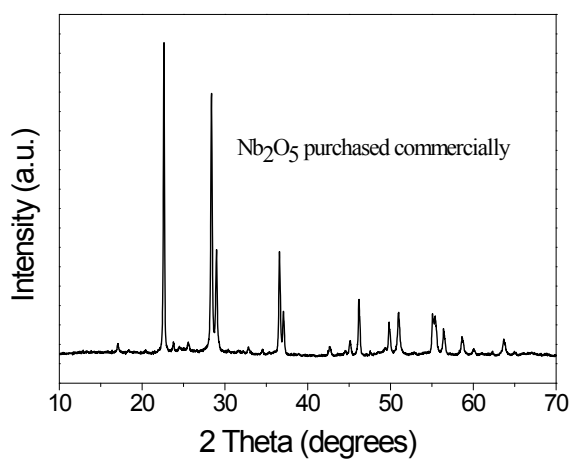

**Figure S8.** XRD pattern of the  $\text{Nb}_2\text{O}_5$  raw material purchased commercially which was used to synthesize the  $\text{Nb}_2\text{O}_5$  products with different morphologies in this work.
